# Supplementary material for: No evidence of whole population mental health impact of the Triple P parenting programme: findings from a routine dataset
Source: Springer Nature journal article supplement (doi:10.1186/s12887-017-0800-5), 2017-01-31
Supplement: MOESM2 [file 12029942]

**Additional file 2: Figure S2 Mean Total Difficulties score by Glasgow Deprivation Quintile and Year**

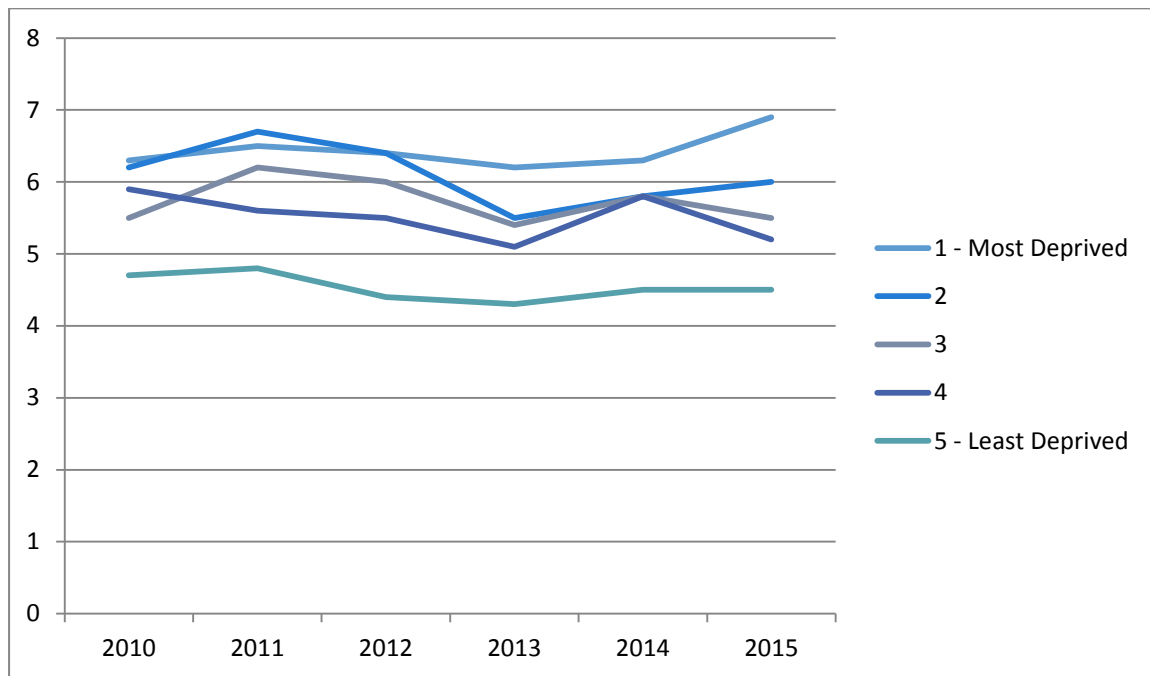

*Base: 26,156*
