# Supplementary material for: No evidence of whole population mental health impact of the Triple P parenting programme: findings from a routine dataset
Source: Springer Nature journal article supplement (doi:10.1186/s12887-017-0800-5), 2017-01-31
Supplement: MOESM3 [file 12029942]

**Additional file 3: Figure S1 Proportion of children with abnormal scores on the SDQ subscales**

**by year: top = data from all nurseries; bottom = data from nurseries which returned SDQs**

**every year**

**All nurseries**

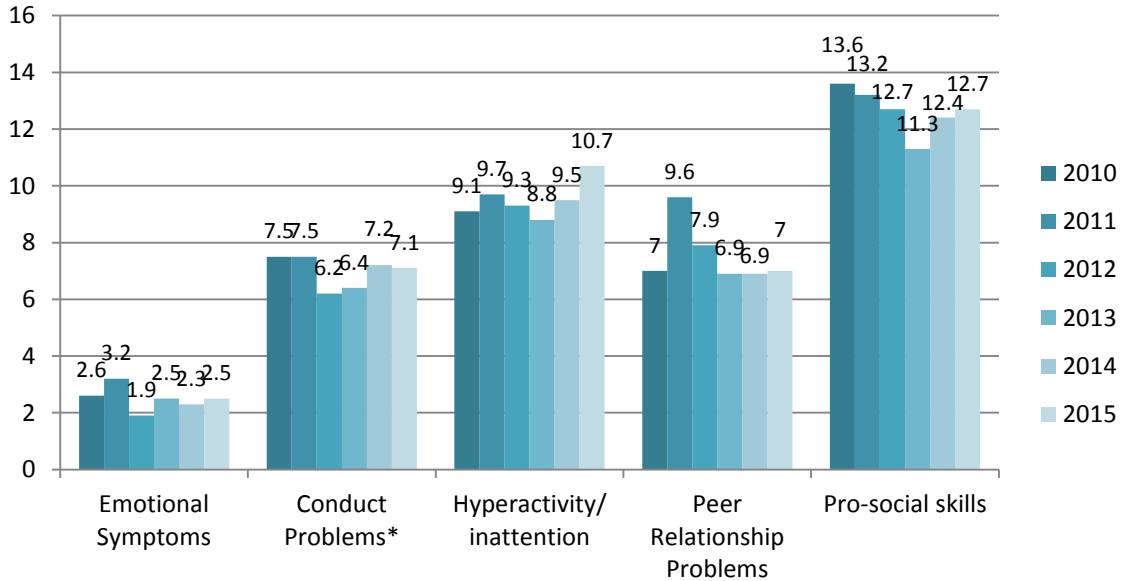

**Nurseries which returned every year**

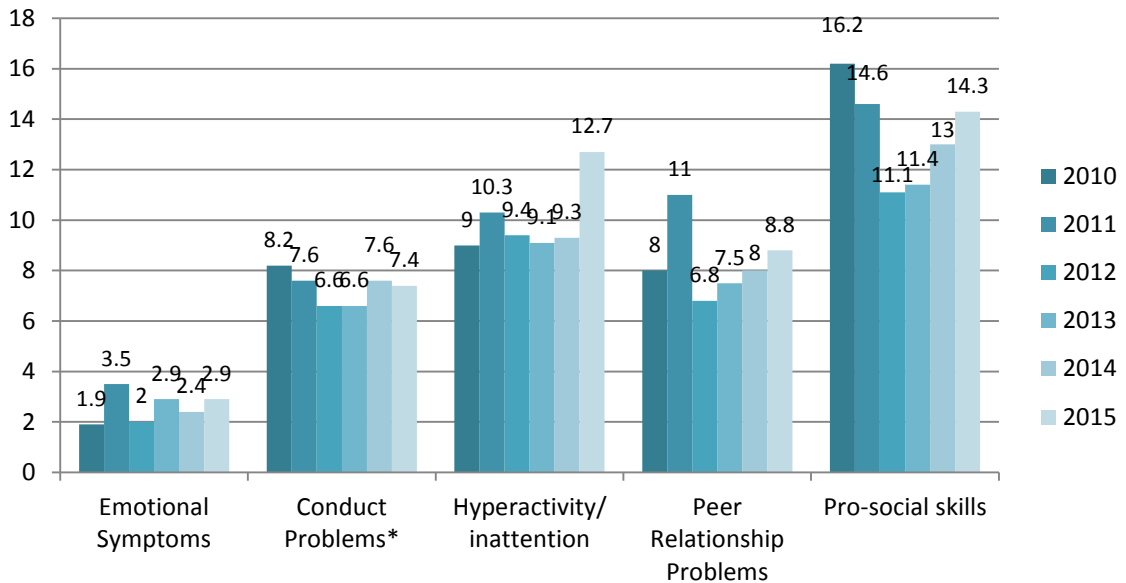

*Bases: 27,908 \*Using the 3-question conduct problems version completed every year*
