# Supplementary material for: No evidence of whole population mental health impact of the Triple P parenting programme: findings from a routine dataset
Source: Springer Nature journal article supplement (doi:10.1186/s12887-017-0800-5), 2017-01-31
Supplement: MOESM4 [file 12029942]

**Additional file 4: Table S1 – Post hoc Tukey test results for Total Difficulties scores by cohort year**

|                                                 |             | <b>Mean difference</b> |             |             |             |             |             |
|-------------------------------------------------|-------------|------------------------|-------------|-------------|-------------|-------------|-------------|
|                                                 |             | <b>2010</b>            | <b>2011</b> | <b>2012</b> | <b>2013</b> | <b>2014</b> | <b>2015</b> |
| All available data                              | <b>2010</b> |                        | 0.404*      | 0.090       | -0.457**    | -0.158      | -0.114      |
|                                                 | <b>2011</b> | -0.404*                |             | -0.313      | -0.861**    | -0.562**    | -0.517**    |
|                                                 | <b>2012</b> | -0.090                 | 0.313       |             | -0.547**    | -0.249      | -0.204      |
|                                                 | <b>2013</b> | 0.457**                | 0.861**     | 0.547**     |             | 0.298       | 0.343*      |
|                                                 | <b>2014</b> | 0.158                  | 0.562**     | 0.249       | -0.298      |             | 0.045       |
|                                                 | <b>2015</b> | 0.114                  | 0.517**     | 0.204       | -0.343*     | -0.045      |             |
| Restricted to nurseries who returned every year | <b>2010</b> |                        | 0.580*      | -0.206      | -0.297      | 0.145       | 0.346       |
|                                                 | <b>2011</b> | -0.580*                |             | -0.786**    | -0.877**    | -0.435      | -0.234      |
|                                                 | <b>2012</b> | 0.206                  | 0.786**     |             | -0.091      | 0.351       | 0.552*      |
|                                                 | <b>2013</b> | 0.297                  | 0.877**     | 0.091       |             | 0.442       | 0.643**     |
|                                                 | <b>2014</b> | -0.145                 | 0.435       | -0.351      | -0.442      |             | 0.201       |
|                                                 | <b>2015</b> | -0.346                 | 0.234       | -0.552*     | -0.643**    | -0.201      |             |

**\*indicates significance at  $p < 0.05$ , \*\* indicates significance at  $p < 0.01$**
